# Supplementary material
Source: MDPI journal article supplement (https://www.mdpi.com/2073-4441/15/14/2527)
Supplement: s1 [file s1]

**Table S1** The species survey in Hutoubi Watershed

|                | family                    | name                                 | 2020 | 2022 |
|----------------|---------------------------|--------------------------------------|------|------|
| Reptiles       |                           |                                      |      |      |
| Squamata       | Scincidae                 | <i>Sphenomorphus indicus</i>         | *    | *    |
|                |                           | <i>Eutropis multifasciata</i>        | *    |      |
|                |                           | <i>Eutropis longicaudata</i>         |      | *    |
|                |                           | <i>Plestiodon elegans</i>            |      | *    |
|                | Agamidae                  | <i>Diploderma swinhonis</i>          | *    | *    |
|                | Gekkonidae                | <i>Hemidactylus frenatus</i>         | *    | *    |
|                |                           | <i>Gekko hokouensis</i>              |      | *    |
| Lacertidae     | <i>Takydromus kuehnei</i> |                                      | *    |      |
| Testudines     | Geoemydidae               | <i>Mauremys sinensis</i>             | *    | *    |
|                | Emydidae                  | <i>Trachemys scripta elegans</i>     | *    |      |
| Amphibians     |                           |                                      |      |      |
| Gymnophiona    | Ranidae                   | <i>Fejervarya limnocharis</i>        | *    | *    |
|                |                           | <i>Rhacophorus moltrechti</i>        | *    |      |
|                | Hylidae                   | <i>Polypedates braueri</i>           | *    |      |
|                |                           | <i>Buergeria japonica</i>            | *    |      |
|                | Bufonidae                 | <i>Hyla chinensis</i>                |      | *    |
|                | Pelobatidae               | <i>Duttaphrynus melanostictus</i>    | *    | *    |
|                | Ranixalidae               | <i>Hylarana guentheri</i>            | *    |      |
|                |                           | <i>Hylarana latouchii</i>            | *    | *    |
|                | Microhylidae              | <i>Microhyla fissipes</i>            | *    | *    |
|                |                           | <i>Microhyla butleri</i>             |      | *    |
|                |                           | <i>Microhyla heymonsi</i>            |      | *    |
|                |                           | <i>Micryletta stejnegeri</i>         |      | *    |
|                |                           |                                      |      |      |
| Fishes         |                           |                                      |      |      |
| Cypriniformes  | Cyprinidae                | <i>Cyprinus carpio carpio</i>        |      | *    |
|                |                           | <i>Opsariichthys pachycephalus</i>   | *    | *    |
|                |                           | <i>Pseudorasbora parva</i>           |      | *    |
|                |                           | <i>Barbonymus gonionotus</i>         | *    | *    |
| Perciformes    | Cichlidae                 | <i>Gambusia affinis</i>              |      | *    |
|                |                           | <i>Poecilia reticulata</i>           |      | *    |
| Serraniformes  | Percidae                  | <i>Rhinogobius giurinus</i>          | *    | *    |
|                |                           | <i>Rhinogobius rubromaculatus</i>    |      | *    |
|                | Anguillidae               | <i>Channa striata</i>                | *    | *    |
|                | Belonidae                 | <i>Oreochromis hybrid</i>            | *    | *    |
| Salmoniformes  | Siluridae                 | <i>Pterygoplichthys disjunctivus</i> |      | *    |
| Percophiformes | Serranidae                | <i>Trichopodus trichopterus</i>      |      | *    |
| Crustaceans    |                           |                                      |      |      |

|                   |               |                                |     |
|-------------------|---------------|--------------------------------|-----|
| Decapoda          | Alpheidae     | <i>Neocaridina denticulata</i> | *   |
|                   |               | <i>Neocaridina saccam</i>      | *   |
|                   | Palaemonidae  | <i>Macrobrachium asperulum</i> | * * |
|                   |               | <i>Macrobrachium australe</i>  | *   |
|                   | Potamidae     | <i>Geothelphusa olea</i>       | *   |
| Stylommatophora   | Ampullariidae | <i>Pomacea canaliculata</i>    | *   |
|                   | Viviparidae   | <i>Sinotaia quadrata</i>       | *   |
|                   | Conidae       | <i>Stenomelania tortuosa</i>   |     |
|                   |               | <i>Tarebia granifera</i>       | *   |
| Architaenioglossa | Turbinellidae | <i>Radix swinhoei</i>          | *   |
| Mytiloida         | Donacidae     | <i>Corbicula fluminea</i>      | *   |

Note: "\*" represents the presence of the species
